# Supplementary material for: Longitudinal resting-state EEG in amyloid-positive patients along the Alzheimer’s disease continuum: considerations for clinical trials
Source: PubMed Central journal article supplement (PMC10585755; doi:10.1186/s13195-023-01327-1), 2023-10-19
Supplement: 13195_2023_1327_MOESM2_ESM.pdf [file 13195_2023_1327_MOESM2_ESM.pdf]

## Supplementary results

**Table S1. Neuropsychological test results of memory clinic patients at baseline (n=93).** Unstandardized scores are presented (median with interquartile range).

| <b>Neuropsychological assessment</b>             | <b>Primary outcome measure</b> | <b>MCI</b> | <b>n</b> | <b>AD</b> | <b>n</b> | <b>Total</b> | <b>n</b> |
|--------------------------------------------------|--------------------------------|------------|----------|-----------|----------|--------------|----------|
| MMSE                                             | Total score (out of 30)        | 27 (2)     | 51       | 23 (6)    | 42       | 26 (4)       | 93       |
| Trail making A                                   | Speed (seconds)                | 47 (26)    | 48       | 56 (36)   | 32       | 50 (36)      | 80       |
| Trail making B                                   | Speed (seconds)                | 130 (80)   | 48       | 221 (173) | 22       | 142 (113)    | 70       |
| Complex rey figure (copy)                        | Total score (out of 36)        | 34 (3)     | 37       | 31 (4)    | 21       | 34 (4)       | 58       |
| Complex rey figure organizational strategy score | Total score (out of 6)         | 3.5 (3)    | 36       | 2 (1)     | 20       | 3 (3)        | 56       |
| Complex rey figure delayed                       | Total correct (out of 36)      | 10 (8)     | 27       | 4 (8)     | 13       | 7.5 (8)      | 40       |
| Forward digit span                               | Total score                    | 6 (2)      | 43       | 5 (1)     | 31       | 6 (2)        | 74       |
| Backward digit span                              | Total score                    | 4 (1)      | 43       | 4 (1)     | 31       | 4 (2)        | 74       |
| Stroop card 1                                    | Reaction time (seconds)        | 46 (11)    | 37       | 54 (19)   | 28       | 49 (14)      | 65       |
| Stroop card 2                                    | Reaction time (seconds)        | 62 (16)    | 37       | 75 (33)   | 28       | 68 (22)      | 65       |
| Stroop card 3                                    | Reaction time (seconds)        | 118 (42)   | 37       | 158 (79)  | 24       | 131 (54)     | 61       |
| 15 words test delayed                            | Total score                    | 3 (2)      | 43       | 0 (1)     | 30       | 1 (3)        | 73       |
| Category fluency (animals)                       | Total score in 60 seconds      | 18 (6)     | 45       | 13 (5)    | 33       | 16 (7)       | 78       |

MCI = Mild Cognitive Impairment; AD = (dementia due to) Alzheimer's Disease; MMSE = Mini Mental State Examination

**Table S2. Neuropsychological test results of trial participants at baseline (n=55).** Unstandardized scores are presented (median with interquartile range). The detection, identification, one-back and one card learning tests are part of the Cogstate Brief Battery™ (Maruff et al., 2013).

| <b>Neuropsychological assessment</b> | <b>Primary outcome measure</b>           | <b>MCI (n=37)</b> | <b>AD (n=18)</b> | <b>Total</b> |
|--------------------------------------|------------------------------------------|-------------------|------------------|--------------|
| MMSE                                 | Total score (out of 30)                  | 27 (4)            | 24 (3)           | 26 (5)       |
| Detection test                       | Speed (log <sub>10</sub> milliseconds)   | 2.5 (0.2)         | 2.5 (0.2)        | 2.5 (0.1)    |
| Identification test                  | Speed (log <sub>10</sub> milliseconds)   | 2.7 (0.1)         | 2.7 (0.1)        | 2.7 (0.1)    |
| One back test                        | Speed (log <sub>10</sub> milliseconds)   | 3.0 (0.1)         | 3.1 (0.1)        | 3.0 (0.1)    |
| One card learning test               | Proportion correct (arcsine square root) | 0.85 (0.1)        | 0.83 (0.1)       | 0.85 (0.1)   |

MCI = Mild Cognitive Impairment; AD = (dementia due to) Alzheimer's Disease; MMSE = Mini Mental State Examination

**Table S3. Comparison of baseline EEG measures between diagnostic groups.**

|                              | MCI           | AD            | Total         | P-value |
|------------------------------|---------------|---------------|---------------|---------|
| Global (mean, SD)            |               |               |               |         |
| Theta power                  | 0.145 (0.066) | 0.181 (0.087) | 0.160 (0.077) | <.01**  |
| Alpha1 power                 | 0.187 (0.120) | 0.143 (0.098) | 0.169 (0.113) | <.05*   |
| Alpha2 power                 | 0.122 (0.065) | 0.113 (0.077) | 0.118 (0.070) | 0.10    |
| Beta power                   | 0.185 (0.073) | 0.163 (0.074) | 0.176 (0.074) | 0.06    |
| AEC-c alpha                  | 0.546 (0.033) | 0.540 (0.029) | 0.544 (0.031) | 0.24    |
| AEC-c beta                   | 0.526 (0.012) | 0.524 (0.011) | 0.525 (0.012) | 0.46    |
| PLI theta                    | 0.150 (0.038) | 0.144 (0.024) | 0.148 (0.033) | 0.96    |
| PE theta                     | 0.385 (0.027) | 0.381 (0.027) | 0.384 (0.027) | 0.29    |
| wSMI theta                   | 0.182 (0.021) | 0.179 (0.019) | 0.181 (0.020) | 0.50    |
| JPE <sub>inv</sub> theta     | 0.429 (0.023) | 0.434 (0.019) | 0.431 (0.022) | 0.31    |
| Parieto-occipital (mean, SD) |               |               |               |         |
| Peak-frequency               | 9.28 (1.10)   | 8.86 (1.35)   | 9.11 (1.22)   | 0.11    |

MCI = Mild Cognitive Impairment; AD = (dementia due to) Alzheimer's Disease; SD = Standard Deviation; AEC-c = corrected Amplitude Envelope Correlation; PLI = Phase Lag Index; wSMI = weighted Symbolic Mutual Information; PE = Permutation Entropy; JPE<sub>inv</sub> = inverted Joint Permutation Entropy.

**Table S4. Results of the group-wise LMM analysis performed to evaluate change in parieto-occipital EEG measures over time (*in months*) in A $\beta$ + MCI or AD dementia patients.** Crude and adjusted regression coefficients ( $\beta$ ) and 95% confidence intervals (CI) are reported.

| Region            | Measure                     | Frequency band      | Predictor           | $\beta$             | 95% CI   |          | p-value  | Adjusted $\beta^a$ | 95% CI <sup>a</sup> |          | p-value <sup>a</sup> |          |
|-------------------|-----------------------------|---------------------|---------------------|---------------------|----------|----------|----------|--------------------|---------------------|----------|----------------------|----------|
| Parieto-occipital | Relative power              | Theta <sup>2</sup>  | MCI                 | <i>Time</i>         | 1.6E-03  | 8.3E-04  | 2.3E-03  | <.001***           | 1.8E-03             | 9.6E-04  | 2.7E-03              | <.001*** |
|                   |                             |                     | AD                  | <i>Time</i>         | 8.7E-04  | -2.0E-04 | 1.9E-03  | 0.12               | 1.1E-03             | -5.0E-05 | 2.2E-03              | 0.06     |
|                   |                             |                     | MCI-AD              | <i>Time x Group</i> | 9.0E-04  | -4.7E-04 | 2.3E-03  | 0.20               | 7.6E-04             | -6.6E-04 | 2.2E-03              | 0.29     |
|                   |                             | Alpha1 <sup>1</sup> | MCI                 | <i>Time</i>         | 3.8E-04  | -1.1E-03 | 1.9E-03  | 0.62               | 2.9E-04             | -1.2E-03 | 1.8E-03              | 0.70     |
|                   |                             |                     | AD                  | <i>Time</i>         | -1.2E-03 | -3.0E-03 | 5.2E-04  | 0.17               | -1.3E-03            | -3.2E-03 | 5.5E-04              | 0.17     |
|                   |                             |                     | MCI-AD              | <i>Time x Group</i> | 1.6E-03  | -7.0E-04 | 3.9E-03  | 0.17               | 1.6E-03             | -7.7E-04 | 4.0E-03              | 0.18     |
|                   |                             | Alpha2 <sup>1</sup> | MCI                 | <i>Time</i>         | -1.3E-04 | -1.5E-03 | 1.2E-03  | 0.86               | -1.7E-04            | -1.5E-03 | 1.2E-03              | 0.81     |
|                   |                             |                     | AD                  | <i>Time</i>         | -4.5E-04 | -2.0E-03 | 1.1E-03  | 0.58               | -3.4E-04            | -2.0E-03 | 1.4E-03              | 0.69     |
|                   |                             |                     | MCI-AD              | <i>Time x Group</i> | 3.2E-04  | -1.8E-03 | 2.4E-03  | 0.76               | 1.7E-04             | -2.0E-03 | 2.3E-03              | 0.87     |
|                   | Beta <sup>1</sup>           | MCI                 | <i>Time</i>         | -1.0E-03            | -1.8E-03 | -2.7E-04 | <.01**   | -1.1E-03           | -1.9E-03            | -3.0E-04 | <.01**               |          |
|                   |                             | AD                  | <i>Time</i>         | -5.0E-04            | -1.4E-03 | 3.9E-04  | 0.27     | -6.7E-04           | -1.6E-03            | 2.9E-04  | 0.17                 |          |
|                   |                             | MCI-AD              | <i>Time x Group</i> | -5.4E-04            | -1.7E-03 | 6.4E-04  | 0.36     | -4.0E-04           | -1.6E-03            | 8.3E-04  | 0.52                 |          |
|                   | Peak-frequency <sup>1</sup> | -                   | MCI                 | <i>Time</i>         | -1.0E-02 | -2.1E-02 | 1.2E-03  | 0.08               | -1.1E-02            | -2.3E-02 | -1.5E-06             | <.05*    |
|                   |                             |                     | AD                  | <i>Time</i>         | -2.3E-02 | -3.6E-02 | -9.6E-03 | <.001***           | -2.3E-02            | -3.7E-02 | -9.2E-03             | <.01**   |
|                   |                             |                     | MCI-AD              | <i>Time x Group</i> | 1.3E-02  | -4.5E-03 | 3.0E-02  | 0.15               | 1.2E-02             | -5.9E-03 | 3.0E-02              | 0.19     |
| AEC-c             | Alpha <sup>1</sup>          | MCI                 | <i>Time</i>         | -1.5E-04            | -6.1E-04 | 3.1E-04  | 0.53     | -1.6E-04           | -6.2E-04            | 3.0E-04  | 0.48                 |          |
|                   |                             | AD                  | <i>Time</i>         | 2.1E-05             | -5.1E-04 | 5.5E-04  | 0.94     | 1.2E-04            | -4.4E-04            | 6.9E-04  | 0.68                 |          |
|                   |                             | MCI-AD              | <i>Time x Group</i> | -1.7E-04            | -8.7E-04 | 5.3E-04  | 0.64     | -2.9E-04           | -1.0E-03            | 4.4E-04  | 0.44                 |          |
|                   | Beta <sup>1</sup>           | MCI                 | <i>Time</i>         | -7.1E-05            | -2.4E-04 | 9.9E-05  | 0.41     | -6.7E-05           | -2.4E-04            | 1.0E-04  | 0.43                 |          |
|                   |                             | AD                  | <i>Time</i>         | -1.2E-04            | -3.2E-04 | 7.5E-05  | 0.22     | -1.6E-04           | -3.7E-04            | 5.1E-05  | 0.14                 |          |
|                   |                             | MCI-AD              | <i>Time x Group</i> | 5.2E-05             | -2.1E-04 | 3.1E-04  | 0.69     | 9.0E-05            | -1.8E-04            | 3.6E-04  | 0.51                 |          |
| PLI               | Theta <sup>1</sup>          | MCI                 | <i>Time</i>         | 1.9E-04             | -3.4E-04 | 7.2E-04  | 0.48     | 1.8E-04            | -3.5E-04            | 7.1E-04  | 0.50                 |          |

|                    |                    |        |                     |          |          |         |      |          |          |         |      |
|--------------------|--------------------|--------|---------------------|----------|----------|---------|------|----------|----------|---------|------|
|                    |                    | AD     | <i>Time</i>         | 2.1E-04  | -4.1E-04 | 8.3E-04 | 0.50 | 1.5E-04  | -5.1E-04 | 8.0E-04 | 0.65 |
|                    |                    | MCI-AD | <i>Time x Group</i> | -2.1E-05 | -8.3E-04 | 7.9E-04 | 0.96 | 3.2E-05  | -8.1E-04 | 8.7E-04 | 0.94 |
| PE                 | Theta <sup>1</sup> | MCI    | <i>Time</i>         | -2.4E-05 | -2.5E-04 | 2.0E-04 | 0.84 | -4.4E-05 | -2.7E-04 | 1.8E-04 | 0.71 |
|                    |                    | AD     | <i>Time</i>         | -2.0E-04 | -4.6E-04 | 6.4E-05 | 0.14 | -1.5E-04 | -4.4E-04 | 1.3E-04 | 0.29 |
|                    |                    | MCI-AD | <i>Time x Group</i> | 1.7E-04  | -1.7E-04 | 5.2E-04 | 0.32 | 1.1E-04  | -2.5E-04 | 4.7E-04 | 0.55 |
| wSMI               | Theta <sup>1</sup> | MCI    | <i>Time</i>         | -1.8E-05 | -1.9E-04 | 1.5E-04 | 0.83 | -2.8E-05 | -2.0E-04 | 1.4E-04 | 0.74 |
|                    |                    | AD     | <i>Time</i>         | 1.4E-04  | -5.2E-05 | 3.4E-04 | 0.15 | 7.9E-05  | -1.3E-04 | 2.9E-04 | 0.46 |
|                    |                    | MCI-AD | <i>Time x Group</i> | -1.6E-04 | -4.2E-04 | 9.5E-05 | 0.21 | -1.1E-04 | -3.7E-04 | 1.6E-04 | 0.43 |
| JPE <sub>inv</sub> | Theta <sup>1</sup> | MCI    | <i>Time</i>         | 7.6E-07  | -1.4E-04 | 1.4E-04 | 0.99 | 1.6E-05  | -1.2E-04 | 1.6E-04 | 0.82 |
|                    |                    | AD     | <i>Time</i>         | -1.3E-04 | -2.9E-04 | 3.6E-05 | 0.13 | -5.4E-05 | -2.3E-04 | 1.2E-04 | 0.55 |
|                    |                    | MCI-AD | <i>Time x Group</i> | 1.3E-04  | -8.6E-05 | 3.4E-04 | 0.24 | 7.0E-05  | -1.5E-04 | 2.9E-04 | 0.53 |

<sup>a</sup>. Adjusted for age, sex and medication use.

<sup>1</sup>. Random intercept on subject level.

<sup>2</sup>. Random intercept and random slope on subject level.

MCI = Mild Cognitive Impairment; AD = (dementia due to) Alzheimer's Disease; SD = Standard Deviation; AEC-c = corrected Amplitude Envelope Correlation; PLI = Phase Lag Index; wSMI = weighted Symbolic Mutual Information; PE = Permutation Entropy; JPE<sub>inv</sub> = inverted Joint Permutation Entropy.

**Table S5. Results of the group-wise LMM analysis performed to evaluate change in temporal EEG measures over time (*in months*) in A $\beta$ + MCI or AD dementia patients. Crude and adjusted regression coefficients ( $\beta$ ) and 95% confidence intervals (CI) are reported.**

| Region   | Measure            | Frequency band      | Predictor           | $\beta$             | 95% CI   |          | p-value | Adjusted $\beta^a$ | 95% CI <sup>a</sup> |          | p-value <sup>a</sup> |          |
|----------|--------------------|---------------------|---------------------|---------------------|----------|----------|---------|--------------------|---------------------|----------|----------------------|----------|
| Temporal | Relative power     | Theta <sup>2</sup>  | MCI                 | <i>Time</i>         | 2.2E-03  | 1.2E-03  | 3.1E-03 | <.001***           | 2.2E-03             | 1.2E-03  | 3.1E-03              | <.001*** |
|          |                    |                     | AD                  | <i>Time</i>         | 8.2E-04  | -3.1E-04 | 2.0E-03 | 0.16               | 8.1E-04             | -3.9E-04 | 2.1E-03              | 0.18     |
|          |                    |                     | MCI-AD              | <i>Time x Group</i> | 1.3E-03  | -1.3E-04 | 2.8E-03 | 0.08               | 1.4E-03             | -1.9E-04 | 2.8E-03              | 0.08     |
|          |                    | Alpha1 <sup>2</sup> | MCI                 | <i>Time</i>         | -3.7E-04 | -1.3E-03 | 5.6E-04 | 0.44               | -3.8E-04            | -1.3E-03 | 6.2E-04              | 0.44     |
|          |                    |                     | AD                  | <i>Time</i>         | -6.0E-04 | -1.7E-03 | 5.0E-04 | 0.30               | -7.3E-04            | -1.9E-03 | 5.3E-04              | 0.24     |
|          |                    |                     | MCI-AD              | <i>Time x Group</i> | 2.2E-04  | -1.2E-03 | 1.7E-03 | 0.76               | 3.6E-04             | -1.2E-03 | 1.9E-03              | 0.65     |
|          |                    | Alpha2 <sup>1</sup> | MCI                 | <i>Time</i>         | -2.5E-04 | -8.4E-04 | 3.4E-04 | 0.41               | -2.9E-04            | -8.8E-04 | 3.0E-04              | 0.34     |
|          |                    |                     | AD                  | <i>Time</i>         | -5.7E-04 | -1.3E-03 | 1.1E-04 | 0.10               | -5.3E-04            | -1.3E-03 | 2.1E-04              | 0.16     |
|          |                    |                     | MCI-AD              | <i>Time x Group</i> | 3.3E-04  | -5.8E-04 | 1.2E-03 | 0.48               | 2.3E-04             | -7.1E-04 | 1.2E-03              | 0.62     |
|          | Beta <sup>1</sup>  | MCI                 | <i>Time</i>         | -8.0E-04            | -1.4E-03 | -1.8E-04 | <.05*   | -8.5E-04           | -1.5E-03            | -2.2E-04 | <.01**               |          |
|          |                    | AD                  | <i>Time</i>         | -5.8E-04            | -1.3E-03 | 1.5E-04  | 0.12    | -6.6E-04           | -1.4E-03            | 1.2E-04  | 0.10                 |          |
|          |                    | MCI-AD              | <i>Time x Group</i> | -2.2E-04            | -1.2E-03 | 7.3E-04  | 0.64    | -1.8E-04           | -1.2E-03            | 8.1E-04  | 0.72                 |          |
|          | AEC-c              | Alpha <sup>1</sup>  | MCI                 | <i>Time</i>         | -1.6E-04 | -5.8E-04 | 2.7E-04 | 0.47               | -1.6E-04            | -5.8E-04 | 2.7E-04              | 0.47     |
|          |                    |                     | AD                  | <i>Time</i>         | -2.2E-05 | -5.1E-04 | 4.7E-04 | 0.93               | 8.4E-05             | -4.4E-04 | 6.1E-04              | 0.75     |
|          |                    |                     | MCI-AD              | <i>Time x Group</i> | -1.3E-04 | -7.8E-04 | 5.1E-04 | 0.68               | -2.4E-04            | -9.1E-04 | 4.3E-04              | 0.48     |
|          |                    | Beta <sup>1</sup>   | MCI                 | <i>Time</i>         | -2.5E-05 | -1.9E-04 | 1.4E-04 | 0.77               | -2.4E-05            | -1.9E-04 | 1.4E-04              | 0.78     |
|          |                    |                     | AD                  | <i>Time</i>         | -5.2E-05 | -2.5E-04 | 1.4E-04 | 0.60               | -1.0E-04            | -3.1E-04 | 1.0E-04              | 0.33     |
|          |                    |                     | MCI-AD              | <i>Time x Group</i> | 2.8E-05  | -2.3E-04 | 2.9E-04 | 0.83               | 8.0E-05             | -1.9E-04 | 3.5E-04              | 0.55     |
| PLI      | Theta <sup>1</sup> | MCI                 | <i>Time</i>         | 1.1E-04             | -3.7E-04 | 5.9E-04  | 0.66    | 1.1E-04            | -3.8E-04            | 5.9E-04  | 0.67                 |          |
|          |                    | AD                  | <i>Time</i>         | 1.5E-04             | -4.0E-04 | 7.1E-04  | 0.59    | 1.5E-04            | -4.4E-04            | 7.4E-04  | 0.61                 |          |
|          |                    | MCI-AD              | <i>Time x Group</i> | -4.8E-05            | -7.8E-04 | 6.9E-04  | 0.90    | -4.8E-05           | -8.1E-04            | 7.1E-04  | 0.90                 |          |
| PE       | Theta <sup>1</sup> | MCI                 | <i>Time</i>         | -9.2E-05            | -3.0E-04 | 1.2E-04  | 0.39    | -1.1E-04           | -3.1E-04            | 1.0E-04  | 0.32                 |          |

|                    |                    |        |                     |          |          |          |       |          |          |         |      |
|--------------------|--------------------|--------|---------------------|----------|----------|----------|-------|----------|----------|---------|------|
|                    |                    | AD     | <i>Time</i>         | -2.5E-04 | -4.9E-04 | -7.6E-06 | <.05* | -2.3E-04 | -4.9E-04 | 3.9E-05 | 0.09 |
|                    |                    | MCI-AD | <i>Time x Group</i> | 1.6E-04  | -1.6E-04 | 4.8E-04  | 0.33  | 1.2E-04  | -2.1E-04 | 4.5E-04 | 0.49 |
| wSMI               | Theta <sup>1</sup> | MCI    | <i>Time</i>         | 1.5E-05  | -1.4E-04 | 1.7E-04  | 0.85  | 7.6E-06  | -1.5E-04 | 1.7E-04 | 0.93 |
|                    |                    | AD     | <i>Time</i>         | 1.5E-04  | -2.8E-05 | 3.4E-04  | 0.10  | 1.0E-04  | -9.3E-05 | 3.0E-04 | 0.30 |
|                    |                    | MCI-AD | <i>Time x Group</i> | -1.4E-04 | -3.8E-04 | 1.0E-04  | 0.25  | -9.7E-05 | -3.5E-04 | 1.5E-04 | 0.44 |
| JPE <sub>inv</sub> | Theta <sup>1</sup> | MCI    | <i>Time</i>         | -5.0E-05 | -1.7E-04 | 6.7E-05  | 0.40  | -9.7E-05 | -2.2E-04 | 2.7E-05 | 0.13 |
|                    |                    | AD     | <i>Time</i>         | -1.3E-04 | -2.7E-04 | 6.9E-06  | 0.07  | -1.5E-04 | -3.0E-04 | 8.5E-06 | 0.07 |
|                    |                    | MCI-AD | <i>Time x Group</i> | 8.0E-05  | -1.0E-04 | 2.6E-04  | 0.38  | 4.9E-05  | -1.4E-04 | 2.4E-04 | 0.61 |

<sup>a</sup>. Adjusted for age, sex and medication use.

<sup>1</sup>. Random intercept on subject level.

<sup>2</sup>. Random intercept and random slope on subject level.

MCI = Mild Cognitive Impairment; AD = (dementia due to) Alzheimer's Disease; SD = Standard Deviation; AEC-c = corrected Amplitude Envelope Correlation; PLI = Phase Lag Index; wSMI = weighted Symbolic Mutual Information; PE = Permutation Entropy; JPE<sub>inv</sub> = inverted Joint Permutation Entropy.

**Table S6. Results of the group-wise LMM analysis performed to evaluate change in global EEG measures over time (*in months*) in A $\beta$ + MCI or AD dementia patients.** Crude and adjusted regression coefficients ( $\beta$ ) and 95% confidence intervals (CI) are reported.

| Region | Measure            | Frequency band      | Predictor           | $\beta$             | 95% CI   |          | p-value | Adjusted $\beta^a$ | 95% CI <sup>a</sup> |          | p-value <sup>a</sup> |          |
|--------|--------------------|---------------------|---------------------|---------------------|----------|----------|---------|--------------------|---------------------|----------|----------------------|----------|
| Global | Relative power     | Theta <sup>2</sup>  | MCI                 | <i>Time</i>         | 1.8E-03  | 1.1E-03  | 2.6E-03 | <.001***           | 1.9E-03             | 1.1E-03  | 2.7E-03              | <.001*** |
|        |                    |                     | AD                  | <i>Time</i>         | 9.3E-04  | -4.6E-05 | 1.9E-03 | 0.07               | 1.1E-03             | 3.5E-05  | 2.1E-03              | <.05*    |
|        |                    |                     | MCI-AD              | <i>Time x Group</i> | 9.0E-04  | -3.5E-04 | 2.1E-03 | 0.16               | 8.2E-04             | -4.8E-04 | 2.1E-03              | 0.21     |
|        |                    | Alpha1 <sup>2</sup> | MCI                 | <i>Time</i>         | -2.4E-04 | -1.3E-03 | 7.8E-04 | 0.64               | -2.5E-04            | -1.3E-03 | 8.5E-04              | 0.63     |
|        |                    |                     | AD                  | <i>Time</i>         | -9.9E-04 | -2.2E-03 | 1.8E-04 | 0.10               | -1.1E-03            | -2.4E-03 | 2.7E-04              | 0.11     |
|        |                    |                     | MCI-AD              | <i>Time x Group</i> | 7.5E-04  | -8.0E-04 | 2.3E-03 | 0.35               | 8.2E-04             | -8.4E-04 | 2.5E-03              | 0.33     |
|        |                    | Alpha2 <sup>1</sup> | MCI                 | <i>Time</i>         | -1.9E-04 | 1.0E-03  | 6.2E-04 | 0.64               | -2.5E-04            | -1.1E-03 | 5.6E-04              | 0.55     |
|        |                    |                     | AD                  | <i>Time</i>         | -4.8E-04 | -1.4E-03 | 4.6E-04 | 0.32               | -4.4E-04            | -1.4E-03 | 5.6E-04              | 0.39     |
|        |                    |                     | MCI-AD              | <i>Time x Group</i> | 2.9E-04  | -9.5E-04 | 1.5E-03 | 0.65               | 1.9E-04             | -1.1E-03 | 1.5E-03              | 0.77     |
|        | Beta <sup>1</sup>  | MCI                 | <i>Time</i>         | -7.0E-04            | -1.3E-03 | -5.1E-05 | <.05*   | -7.6E-04           | -1.4E-03            | -9.8E-05 | <.05*                |          |
|        |                    | AD                  | <i>Time</i>         | -3.2E-04            | -1.1E-03 | 4.3E-04  | 0.40    | -4.8E-04           | -1.3E-03            | 3.4E-04  | 0.25                 |          |
|        |                    | MCI-AD              | <i>Time x Group</i> | -3.8E-04            | -1.4E-03 | 6.2E-04  | 0.46    | -2.8E-04           | -1.3E-03            | 7.6E-04  | 0.60                 |          |
|        | AEC-c              | Alpha <sup>1</sup>  | MCI                 | <i>Time</i>         | -1.7E-04 | -5.9E-04 | 2.5E-04 | 0.42               | -1.8E-04            | -6.0E-04 | 2.4E-04              | 0.40     |
|        |                    |                     | AD                  | <i>Time</i>         | 1.3E-05  | -4.7E-04 | 5.0E-04 | 0.96               | 1.3E-04             | -3.9E-04 | 6.4E-04              | 0.62     |
|        |                    |                     | MCI-AD              | <i>Time x Group</i> | -1.8E-04 | -8.3E-04 | 4.6E-04 | 0.57               | -3.1E-04            | -9.7E-04 | 3.5E-04              | 0.36     |
|        |                    | Beta <sup>1</sup>   | MCI                 | <i>Time</i>         | -3.4E-05 | -1.9E-04 | 1.2E-04 | 0.67               | -3.3E-05            | -1.9E-04 | 1.3E-04              | 0.68     |
|        |                    |                     | AD                  | <i>Time</i>         | -9.1E-05 | -2.7E-04 | 9.3E-05 | 0.33               | -1.2E-04            | -3.2E-04 | 7.1E-05              | 0.21     |
|        |                    |                     | MCI-AD              | <i>Time x Group</i> | 5.7E-05  | -1.9E-04 | 3.0E-04 | 0.65               | 9.1E-05             | -1.6E-04 | 3.4E-04              | 0.48     |
| PLI    | Theta <sup>1</sup> | MCI                 | <i>Time</i>         | 1.3E-04             | -3.2E-04 | 5.8E-04  | 0.58    | 1.3E-04            | -3.3E-04            | 5.8E-04  | 0.58                 |          |
|        |                    | AD                  | <i>Time</i>         | 1.8E-04             | -3.5E-04 | 7.0E-04  | 0.50    | 1.9E-04            | -3.6E-04            | 7.5E-04  | 0.50                 |          |
|        |                    | MCI-AD              | <i>Time x Group</i> | -5.0E-05            | -7.4E-04 | 6.4E-04  | 0.89    | -6.5E-05           | -7.8E-04            | 6.5E-04  | 0.86                 |          |
| PE     | Theta <sup>1</sup> | MCI                 | <i>Time</i>         | -5.5E-05            | -2.6E-04 | 1.5E-04  | 0.60    | -7.6E-05           | -2.8E-04            | 1.3E-04  | 0.47                 |          |



|                    |                    |        |                     |          |          |         |      |          |          |         |      |
|--------------------|--------------------|--------|---------------------|----------|----------|---------|------|----------|----------|---------|------|
|                    |                    | AD     | <i>Time</i>         | -2.3E-04 | -4.6E-04 | 1.2E-05 | 0.06 | -1.9E-04 | -4.5E-04 | 6.8E-05 | 0.18 |
|                    |                    | MCI-AD | <i>Time x Group</i> | 1.7E-04  | -1.4E-04 | 4.8E-04 | 0.28 | 1.2E-04  | -2.1E-04 | 4.4E-04 | 0.49 |
| wSMI               | Theta <sup>1</sup> | MCI    | <i>Time</i>         | 2.9E-06  | -1.5E-04 | 1.6E-04 | 0.97 | -4.8E-06 | -1.6E-04 | 1.5E-04 | 0.95 |
|                    |                    | AD     | <i>Time</i>         | 1.5E-04  | -3.3E-05 | 3.3E-04 | 0.11 | 9.7E-05  | -1.0E-04 | 2.9E-04 | 0.34 |
|                    |                    | MCI-AD | <i>Time x Group</i> | -1.5E-04 | -3.9E-04 | 9.3E-05 | 0.23 | -1.0E-04 | -3.5E-04 | 1.5E-04 | 0.42 |
| JPE <sub>inv</sub> | Theta <sup>1</sup> | MCI    | <i>Time</i>         | -5.6E-06 | -1.4E-04 | 1.3E-04 | 0.93 | 1.2E-05  | -1.2E-04 | 1.5E-04 | 0.86 |
|                    |                    | AD     | <i>Time</i>         | -1.2E-04 | -2.8E-04 | 3.4E-05 | 0.12 | -5.6E-05 | -2.3E-04 | 1.2E-04 | 0.52 |
|                    |                    | MCI-AD | <i>Time x Group</i> | 1.2E-04  | -8.8E-05 | 3.2E-04 | 0.26 | 6.7E-05  | -1.5E-04 | 2.8E-04 | 0.53 |

<sup>a</sup>. Adjusted for age, sex and medication use.

<sup>1</sup>. Random intercept on subject level.

<sup>2</sup>. Random intercept and random slope on subject level.

MCI = Mild Cognitive Impairment; AD = (dementia due to) Alzheimer's Disease; SD = Standard Deviation; AEC-c = corrected Amplitude Envelope Correlation; PLI = Phase Lag Index; wSMI = weighted Symbolic Mutual Information; PE = Permutation Entropy; JPE<sub>inv</sub> = inverted Joint Permutation Entropy.

**Table S7. Longitudinal effect sizes of whole-group LMM results.**

| Analyzed subjects                  | Region                         | Frequency band     | Measure        | Effect size<br>(50% less deterioration) |         | Effect size<br>(stabilization) <sup>3</sup> |         | Effect size<br>(50% improvement) |         |
|------------------------------------|--------------------------------|--------------------|----------------|-----------------------------------------|---------|---------------------------------------------|---------|----------------------------------|---------|
|                                    |                                |                    |                | 1 year                                  | 2 years | 1 year                                      | 2 years | 1 year                           | 2 years |
| Whole-group<br>(MCI + AD dementia) | Temporal                       | Theta <sup>2</sup> | Relative power | 0.11                                    | 0.23    | 0.23                                        | 0.45    | 0.34                             | 0.68    |
|                                    | Parieto-occipital <sup>1</sup> | -                  | Peak frequency | 0.07                                    | 0.15    | 0.15                                        | 0.30    | 0.22                             | 0.45    |
|                                    | Temporal                       | Beta <sup>1</sup>  | Relative power | 0.06                                    | 0.12    | 0.12                                        | 0.24    | 0.18                             | 0.35    |

<sup>1</sup> Random intercept on subject level

<sup>2</sup> Random intercept and random slope on subject level.

<sup>3</sup> Effect sizes as directly computed from the LMM results; magnitude of the natural change of the EEG outcome measures over time.

MCI = Mild Cognitive Impairment; AD = (dementia due to) Alzheimer's Disease; PE = Permutation Entropy

**Table S8. Longitudinal effect sizes of group-wise LMM results.**

| Analyzed subjects | Region                         | Frequency band     | Measure        | Effect size<br>(50% less deterioration) |         | Effect size<br>(stabilization) <sup>3</sup> |         | Effect size<br>(50% improvement) |         |
|-------------------|--------------------------------|--------------------|----------------|-----------------------------------------|---------|---------------------------------------------|---------|----------------------------------|---------|
|                   |                                |                    |                | 1 year                                  | 2 years | 1 year                                      | 2 years | 1 year                           | 2 years |
| MCI               | Temporal                       | Theta <sup>2</sup> | Relative power | 0.15                                    | 0.30    | 0.30                                        | 0.60    | 0.45                             | 0.89    |
|                   | Parieto-occipital              | Beta <sup>1</sup>  | Relative power | 0.07                                    | 0.14    | 0.14                                        | 0.28    | 0.21                             | 0.42    |
| AD dementia       | Parieto-occipital <sup>1</sup> | -                  | Peak frequency | 0.11                                    | 0.23    | 0.23                                        | 0.45    | 0.34                             | 0.68    |
|                   | Temporal                       | Theta <sup>1</sup> | PE             | 0.06                                    | 0.11    | 0.11                                        | 0.22    | 0.17                             | 0.33    |

<sup>1</sup> Random intercept on subject level

<sup>2</sup> Random intercept and random slope on subject level.

<sup>3</sup> Effect size as directly computed from the LMM results; magnitude of the natural change of the EEG outcome measures over time.

MCI = Mild Cognitive Impairment; AD = (dementia due to) Alzheimer's Disease; PE = Permutation Entropy

**Table S9. Three-month effect sizes (measured as Cohen’s *d*) for EEG measures that demonstrated a significant change over time in the trial dataset (n=55, median follow-up duration 3 months), clinical dataset (n=93, median follow-up duration 13.2 months) and total dataset (n=148, median follow-up duration 7.2 months).** In the trial dataset, only relative theta power exhibited a significant change over time. In the clinical dataset, additional measures (i.e., relative *beta* power, peak frequency and permutation entropy) demonstrated significant change over time. Effect sizes in the trial dataset are considerably larger than those in the clinical dataset. When considering the results of the full dataset, they align more closely with the clinical data.

| <b>Cohort</b>     | <b>Region</b>     | <b>Frequency band</b> | <b>Measure</b>      | <b>d (3 months)</b> |
|-------------------|-------------------|-----------------------|---------------------|---------------------|
| Trial             | Parieto-occipital | Theta                 | Relative power      | 0.16                |
|                   | Whole-brain       | Theta                 | Relative power      | 0.15                |
|                   | Temporal          | Theta                 | Relative power      | 0.13                |
| Clinical          | Temporal          | Theta                 | Relative power      | 0.05                |
|                   | Whole-brain       | Theta                 | Relative power      | 0.05                |
|                   | Parieto-occipital | Theta                 | Relative power      | 0.03                |
|                   | Parieto-occipital | -                     | Peak frequency      | 0.03                |
|                   | Temporal          | Beta                  | Relative power      | 0.03                |
|                   | Parieto-occipital | Beta                  | Relative power      | 0.03                |
|                   | Whole-brain       | Beta                  | Relative power      | 0.02                |
|                   | Temporal          | Theta                 | Permutation entropy | 0.02                |
|                   | Total             | Temporal              | Theta               | Relative power      |
| Whole-brain       |                   | Theta                 | Relative power      | 0.06                |
| Parieto-occipital |                   | Theta                 | Relative power      | 0.05                |
| Parieto-occipital |                   | -                     | Peak frequency      | 0.04                |
| Parieto-occipital |                   | Beta                  | Relative power      | 0.03                |
| Temporal          |                   | Beta                  | Relative power      | 0.03                |
| Whole-brain       |                   | Beta                  | Relative power      | 0.02                |
